# Supplementary material
Source: publisher site journal article supplement (https://www.dovepress.com/article/457655)
Supplement: Supplementary file 1 [file get_supplementary_file.php]

Supplementary File 1

Table 1 Attributes and levels initially identified through literature reviews

| Dimension | Attribute | Levels |
| --- | --- | --- |
| Forms of implementation | Types of PMCs | - Physician-pharmacist joint clinic - Comprehensive pharmaceutical clinic - Pharmaceutical specialist clinic |
| Appointment | - Online - Offline |
| Follow up | - Online - Offline |
| Facilities | Consultation room | - Dedicated consultation room - Shared consultation rooms with other clinics - Only a consultation window |
| Service content | Core content | - Evaluation of medication regimen - Developing or adjusting medication regimen - Patient medication education and counseling - Follow-up on medication |
| Specialty | - Anticoagulation - Respiratory - Geriatric, - Pain |
| Content of medication counselling | - Adverse drug reaction - Drug-drug Interactions and Contraindications - Dosage and administration - Medication adjustment - Drug selection |
| Type of medication counselling | - Pharmacist initiated enquiry - Pharmacist answering enquiry |
| Personnel requirements | Pharmacists’ professional title | - Chief Pharmacist - Deputy Chief Pharmacist - Pharmacist-in-charge - Pharmacist - Deputy Pharmacist |
| Work experience | - Less than 1 year - 1-5 years - 5-10 years - More than 10 years |
| Professional knowledge | - Very well - Fairly well - Fair - Fairly poor - Very poor |
| Practice competency | - Very well - Fairly well - Fair - Fairly poor - Very poor |
| Communication skills | - Very well - Fairly well - Fair - Fairly poor - Very poor |
| Prescription rights | - No prescribing rights - With agreed prescribing rights in some specialist pharmacy clinics - With agreed prescribing rights |
| Fee | Charging Methods | - Charge according to pharmacist title - Charge according to service line - Charge according to time of service - Others |
| Price | - Free - Refer to doctor registration fee |
| Time | Frequency | - Full-day clinic on weekdays - Half-day clinic on weekdays - 2-4 times per week |
| waiting time | - Less than 10 mins - 10-30 mins - 30-60 mins - More than 60 mins |
| Single visit time | - Less than 20 mins - 20-40 mins - 40-60 mins - More than 60 mins |

Supplementary File 2

Questionnaire of Residents’ Preferences for Pharmacist-Managed Clinic

Dear respondents:

This is a questionnaire about the residents’ preferences for pharmacist-managed clinic. It aims to understand the preference from residents’ perspectives so as to provide information for the development of pharmacist-managed clinic in China. We promise that the survey results will be kept strictly confidential and used only for academic research and not for any commercial purpose.

If you have any questions about the requirements of the questionnaire, please feel free to ask the investigator. Thank you for your support and cooperation.

**Part Ⅰ**

Explanation of concepts covered in the questionnaire:

**Pharmacist-Managed Clinic.** Pharmacist-Managed Clinic refers to outpatient that providing a series of specialized pharmaceutical services by pharmacists, such as medication evaluation, medication consultation, patient education and suggestions for adjustment of medication regimen.

**Physician-pharmacist Joint Clinic.** Physician-pharmacist Joint Clinic refers to an outpatient clinic in which a pharmacist and a physician work together to treat patients in the same or an adjacent consultation room.

**Comprehensive Pharmaceutical Clinic.** Comprehensive Pharmaceutical Clinic is a kind of drug consultation clinic which is not limited to specific drug categories and diseases.

**Pharmaceutical Specialist Clinic.** Pharmaceutical Specialist Clinic refers to a specialized clinic that focus on a certain type of medication or a certain disease, such as anticoagulant medication, pain medication, etc.

**Part Ⅱ**

| 1.Your gender | □Male  □Female |
| --- | --- |
| 2. Your age: | __________ |
| 3. Current address | __________ district |
| 4. Your education | □Completed or did not complete primary school  □Completed Middle school  □Completed High school  □Bachelor or above |
| 5. Your current marital status | □Unmarried  □Married  □Divorced or widowed |
| 6. Your current occupational status | □Employed  □Retired  □Unemployed |
| 7. Monthly income per capita of household (CNY) | □<1000  □1000-3000  □3000-5000  □5000-10000  □>10000 |
| 8. Your medical insurance (multiple choice) | □Participation in basic endowment insurance for the urban working group  □Participation in social endowment insurance for urban and rural residents  □Participation in commercial medical insurance  □Uninsured |
| 9. Your health status | □Very poor  □Poor  □Fair  □Good  □Very good |
| 10. Whether you have a chronic disease | □Yes  □No |
| 11. Have you ever experienced pharmacist-managed clinic | □Yes  □No |
| 12. Your knowledge of pharmacist-managed clinic | □Very poor  □Poor  □Fair  □Good  □Very good |

**Part Ⅲ**

Assuming you will be attending a pharmacist-managed clinic, please consider the following hypothetical options, ticking below your preferred choice.

Version one

| 1. | | | |
| --- | --- | --- | --- |
|  | Option 1 | Option 2 | Option 3 |
| Pharmacist-Managed Clinic Core (Focus) | Developing or adjusting medication regimen | Patient medication education and counseling | Neither. |
| Frequency | Full or half-day clinic on weekdays | 3-4 times per week |
| Type | Physician-pharmacist joint clinic | Comprehensive pharmaceutical clinic |
| Consultation Room | Only a consultation window | Shared consultation rooms with other clinics |
| Pharmacist’ Knowledge and Clinical Medication Practice Competency | Good | Poor |
| Fee | Free | Fixed fee (￥10-12) |
| Which one would you prefer? |  |  |  |
| 2. | | | |
|  | Option 1 | Option 2 | Option 3 |
| Pharmacist-Managed Clinic Core (Focus) | Patient medication education and counseling | Evaluation of medication regimen | Neither. |
| Frequency | Full or half-day clinic on weekdays | 3-4 times per week |
| Type | Comprehensive pharmaceutical clinic | Physician-pharmacist joint clinic |
| Consultation Room | Dedicated consultation room | Shared consultation rooms with other clinics |
| Pharmacist’ Knowledge and Clinical Medication Practice Competency | Fair | Good |
| Fee | Free | Charge according to pharmacist title (refer to doctor registration fee) |
| Which one would you prefer? |  |  |  |
| 3. | | | |
|  | Option 1 | Option 2 | Option 3 |
| Pharmacist-Managed Clinic Core (Focus) | Follow-up on medication | Evaluation of medication regimen | Neither. |
| Frequency | 1-2 times per week | Full or half-day clinic on weekdays |
| Type | Comprehensive pharmaceutical clinic | Pharmaceutical specialist clinic |
| Consultation Room | Shared consultation rooms with other clinics | Dedicated consultation room |
| Pharmacist’ Knowledge and Clinical Medication Practice Competency | Good | Poor |
| Fee | Fixed fee (￥10-12) | Free |
| Which one would you prefer? |  |  |  |
| 4. | | | |
|  | Option 1 | Option 2 | Option 3 |
| Pharmacist-Managed Clinic Core (Focus) | Evaluation of medication regimen | Follow-up on medication | Neither. |
| Frequency | 1-2 times per week | Full or half-day clinic on weekdays |
| Type | Physician-pharmacist joint clinic | Comprehensive pharmaceutical clinic |
| Consultation Room | Shared consultation rooms with other clinics | Dedicated consultation room |
| Pharmacist’ Knowledge and Clinical Medication Practice Competency | Fair | Good |
| Fee | Free | Charge according to pharmacist title (refer to doctor registration fee) |
| Which one would you prefer? |  |  |  |
| 5. | | | |
|  | Option 1 | Option 2 | Option 3 |
| Pharmacist-Managed Clinic Core (Focus) | Developing or adjusting medication regimen | Follow-up on medication | Neither. |
| Frequency | 3-4 times per week | 1-2 times per week |
| Type | Physician-pharmacist joint clinic | Pharmaceutical specialist clinic |
| Consultation Room | Only a consultation window | Shared consultation rooms with other clinics |
| Pharmacist’ Knowledge and Clinical Medication Practice Competency | Fair | Good |
| Fee | Fixed fee | Free |
| Which one would you prefer? |  |  |  |
| 6. | | | |
|  | Option 1 | Option 2 | Option 3 |
| Pharmacist-Managed Clinic Core (Focus) | Patient medication education and counseling | Developing or adjusting medication regimen | Neither. |
| Frequency | 3-4 times per week | Full or half-day clinic on weekdays |
| Type | Physician-pharmacist joint clinic | Pharmaceutical specialist clinic |
| Consultation Room | Shared consultation rooms with other clinics | Only a consultation window |
| Pharmacist’ Knowledge and Clinical Medication Practice Competency | Good | Poor |
| Fee | Charge according to pharmacist title (refer to doctor registration fee) | Fixed fee (￥10-12) |
| Which one would you prefer? |  |  |  |
| 7. | | | |
|  | Option 1 | Option 2 | Option 3 |
| Pharmacist-Managed Clinic Core (Focus) | Developing or adjusting medication regimen | Evaluation of medication regimen | Neither. |
| Frequency | Full or half-day clinic on weekdays | 1-2 times per week |
| Type | Physician-pharmacist joint clinic | Comprehensive pharmaceutical clinic |
| Consultation Room | Shared consultation rooms with other clinics | Only a consultation window |
| Pharmacist’ Knowledge and Clinical Medication Practice Competency | Good | Fair |
| Fee | Fixed fee (￥10-12) | Free |
| Which one would you prefer? |  |  |  |
| 8. | | | |
|  | Option 1 | Option 2 | Option 3 |
| Pharmacist-Managed Clinic Core (Focus) | Developing or adjusting medication regimen | Follow-up on medication | Neither. |
| Frequency | 3-4 times per week | Full or half-day clinic on weekdays |
| Type | Pharmaceutical specialist clinic | Comprehensive pharmaceutical clinic |
| Consultation Room | Shared consultation rooms with other clinics | Dedicated consultation room |
| Pharmacist’ Knowledge and Clinical Medication Practice Competency | Poor | Fair |
| Fee | Free | Charge according to pharmacist title (refer to doctor registration fee) |
| Which one would you prefer? |  |  |  |
| 9. | | | |
|  | Option 1 | Option 2 | Option 3 |
| Pharmacist-Managed Clinic Core (Focus) | Evaluation of medication regimen | Follow-up on medication | Neither. |
| Frequency | Full or half-day clinic on weekdays | 1-2 times per week |
| Type | Pharmaceutical specialist clinic | Comprehensive pharmaceutical clinic |
| Consultation Room | Dedicated consultation room | Shared consultation rooms with other clinics |
| Pharmacist’ Knowledge and Clinical Medication Practice Competency | Fair | Poor |
| Fee | Charge according to pharmacist title (refer to doctor registration fee) | Free |
| Which one would you prefer? |  |  |  |
| 10. | | | |
|  | Option 1 | Option 2 | Option 3 |
| Pharmacist-Managed Clinic Core (Focus) | Patient medication education and counseling | Evaluation of medication regimen | Neither. |
| Frequency | 3-4 times per week | 1-2 times per week |
| Type | Pharmaceutical specialist clinic | Physician-pharmacist joint clinic |
| Consultation Room | Only a consultation window | Dedicated consultation room |
| Pharmacist’ Knowledge and Clinical Medication Practice Competency | Poor | Fair |
| Fee | Charge according to pharmacist title (refer to doctor registration fee) | Fixed fee (￥10-12) |
| Which one would you prefer? |  |  |  |
| 11. | | | |
|  | Option 1 | Option 2 | Option 3 |
| Pharmacist-Managed Clinic Core (Focus) | Patient medication education and counseling | Evaluation of medication regimen | Neither. |
| Frequency | 3-4 times per week | Full or half-day clinic on weekdays |
| Type | Comprehensive pharmaceutical clinic | Pharmaceutical specialist clinic |
| Consultation Room | Dedicated consultation room | Shared consultation rooms with other clinics |
| Pharmacist’ Knowledge and Clinical Medication Practice Competency | Fair | Poor |
| Fee | Charge according to pharmacist title (refer to doctor registration fee) | Fixed fee (￥10-12) |
| Which one would you prefer? |  |  |  |
| 12. | | | |
|  | Option 1 | Option 2 | Option 3 |
| Pharmacist-Managed Clinic Core (Focus) | Patient medication education and counseling | Developing or adjusting medication regimen | Neither. |
| Frequency | 1-2 times per week | 3-4 times per week |
| Type | Physician-pharmacist joint clinic | Pharmaceutical specialist clinic |
| Consultation Room | Only a consultation window | Dedicated consultation room |
| Pharmacist’ Knowledge and Clinical Medication Practice Competency | Poor | Fair |
| Fee | Charge according to pharmacist title (refer to doctor registration fee) | Fixed fee (￥10-12) |
| Which one would you prefer? |  |  |  |
| 13. | | | |
|  | Option 1 | Option 2 | Option 3 |
| Pharmacist-Managed Clinic Core (Focus) | Follow-up on medication | Evaluation of medication regimen | Neither. |
| Frequency | 1-2 times per week | Full or half-day clinic on weekdays |
| Type | Comprehensive pharmaceutical clinic | Pharmaceutical specialist clinic |
| Consultation Room | Shared consultation rooms with other clinics | Dedicated consultation room |
| Pharmacist’ Knowledge and Clinical Medication Practice Competency | Good | Poor |
| Fee | Fixed fee (￥10-12) | Free |
| Which one would you prefer? |  |  |  |

Version two

| 1. | | | |
| --- | --- | --- | --- |
|  | Option 1 | Option 2 | Option 3 |
| Pharmacist-Managed Clinic Core (Focus) | Developing or adjusting medication regimen | Follow-up on medication | Neither. |
| Frequency | Full or half-day clinic on weekdays | 3-4 times per week |
| Type | Comprehensive pharmaceutical clinic | Physician-pharmacist joint clinic |
| Consultation Room | Dedicated consultation room | Only a consultation window |
| Pharmacist’ Knowledge and Clinical Medication Practice Competency | Poor | Good |
| Fee | Charge according to pharmacist title (refer to doctor registration fee) | Fixed fee (￥10-12) |
| Which one would you prefer? |  |  |  |
| 2. | | | |
|  | Option 1 | Option 2 | Option 3 |
| Pharmacist-Managed Clinic Core (Focus) | Patient medication education and counseling | Evaluation of medication regimen | Neither. |
| Frequency | Full or half-day clinic on weekdays | 3-4 times per week |
| Type | Pharmaceutical specialist clinic | Comprehensive pharmaceutical clinic |
| Consultation Room | Shared consultation rooms with other clinics | Only a consultation window |
| Pharmacist’ Knowledge and Clinical Medication Practice Competency | Good | Poor |
| Fee | Free | Fixed fee (￥10-12) |
| Which one would you prefer? |  |  |  |
| 3. | | | |
|  | Option 1 | Option 2 | Option 3 |
| Pharmacist-Managed Clinic Core (Focus) | Patient medication education and counseling | Follow-up on medication | Neither. |
| Frequency | Full or half-day clinic on weekdays | 3-4 times per week |
| Type | Pharmaceutical specialist clinic | Physician-pharmacist joint clinic |
| Consultation Room | Shared consultation rooms with other clinics | Only a consultation window |
| Pharmacist’ Knowledge and Clinical Medication Practice Competency | Good | Poor |
| Fee | Charge according to pharmacist title (refer to doctor registration fee) | Fixed fee (￥10-12) |
| Which one would you prefer? |  |  |  |
| 4. | | | |
|  | Option 1 | Option 2 | Option 3 |
| Pharmacist-Managed Clinic Core (Focus) | Developing or adjusting medication regimen | Evaluation of medication regimen | Neither. |
| Frequency | 1-2 times per week | Full or half-day clinic on weekdays |
| Type | Physician-pharmacist joint clinic | Pharmaceutical specialist clinic |
| Consultation Room | Only a consultation window | Shared consultation rooms with other clinics |
| Pharmacist’ Knowledge and Clinical Medication Practice Competency | Fair | Poor |
| Fee | Charge according to pharmacist title (refer to doctor registration fee) | Fixed fee (￥10-12) |
| Which one would you prefer? |  |  |  |
| 5. | | | |
|  | Option 1 | Option 2 | Option 3 |
| Pharmacist-Managed Clinic Core (Focus) | Follow-up on medication | Patient medication education and counseling | Neither. |
| Frequency | 3-4 times per week | 1-2 times per week |
| Type | Comprehensive pharmaceutical clinic | Pharmaceutical specialist clinic |
| Consultation Room | Shared consultation rooms with other clinics | Only a consultation window |
| Pharmacist’ Knowledge and Clinical Medication Practice Competency | Poor | Fair |
| Fee | Charge according to pharmacist title (refer to doctor registration fee) | Fixed fee (￥10-12) |
| Which one would you prefer? |  |  |  |
| 6. | | | |
|  | Option 1 | Option 2 | Option 3 |
| Pharmacist-Managed Clinic Core (Focus) | Developing or adjusting medication regimen | Evaluation of medication regimen | Neither. |
| Frequency | 3-4 times per week | 1-2 times per week |
| Type | Comprehensive pharmaceutical clinic | Pharmaceutical specialist clinic |
| Consultation Room | Only a consultation window | Dedicated consultation room |
| Pharmacist’ Knowledge and Clinical Medication Practice Competency | Good | Poor |
| Fee | Free | Charge according to pharmacist title (refer to doctor registration fee) |
| Which one would you prefer? |  |  |  |
| 7. | | | |
|  | Option 1 | Option 2 | Option 3 |
| Pharmacist-Managed Clinic Core (Focus) | Developing or adjusting medication regimen | Evaluation of medication regimen | Neither. |
| Frequency | 3-4 times per week | Full or half-day clinic on weekdays |
| Type | Pharmaceutical specialist clinic | Comprehensive pharmaceutical clinic |
| Consultation Room | Dedicated consultation room | Shared consultation rooms with other clinics |
| Pharmacist’ Knowledge and Clinical Medication Practice Competency | Poor | Good |
| Fee | Charge according to pharmacist title (refer to doctor registration fee) | Fixed fee (￥10-12) |
| Which one would you prefer? |  |  |  |
| 8. | | | |
|  | Option 1 | Option 2 | Option 3 |
| Pharmacist-Managed Clinic Core (Focus) | Follow-up on medication | Evaluation of medication regimen | Neither. |
| Frequency | 1-2 times per week | 3-4 times per week |
| Type | Pharmaceutical specialist clinic | Physician-pharmacist joint clinic |
| Consultation Room | Only a consultation window | Dedicated consultation room |
| Pharmacist’ Knowledge and Clinical Medication Practice Competency | Fair | Good |
| Fee | Fixed fee (￥10-12) | Charge according to pharmacist title (refer to doctor registration fee) |
| Which one would you prefer? |  |  |  |
| 9. | | | |
|  | Option 1 | Option 2 | Option 3 |
| Pharmacist-Managed Clinic Core (Focus) | Patient medication education and counseling | Follow-up on medication | Neither. |
| Frequency | 1-2 times per week | Full or half-day clinic on weekdays |
| Type | Pharmaceutical specialist clinic | Physician-pharmacist joint clinic |
| Consultation Room | Only a consultation window | Shared consultation rooms with other clinics |
| Pharmacist’ Knowledge and Clinical Medication Practice Competency | Good | Fair |
| Fee | Fixed fee (￥10-12) | Charge according to pharmacist title (refer to doctor registration fee) |
| Which one would you prefer? |  |  |  |
| 10. | | | |
|  | Option 1 | Option 2 | Option 3 |
| Pharmacist-Managed Clinic Core (Focus) | Developing or adjusting medication regimen | Follow-up on medication | Neither. |
| Frequency | 3-4 times per week | 1-2 times per week |
| Type | Comprehensive pharmaceutical clinic | Physician-pharmacist joint clinic |
| Consultation Room | Dedicated consultation room | Only a consultation window |
| Pharmacist’ Knowledge and Clinical Medication Practice Competency | Good | Fair |
| Fee | Free | Charge according to pharmacist title (refer to doctor registration fee) |
| Which one would you prefer? |  |  |  |
| 11. | | | |
|  | Option 1 | Option 2 | Option 3 |
| Pharmacist-Managed Clinic Core (Focus) | Evaluation of medication regimen | Follow-up on medication | Neither. |
| Frequency | Full or half-day clinic on weekdays | 1-2 times per week |
| Type | Comprehensive pharmaceutical clinic | Pharmaceutical specialist clinic |
| Consultation Room | Only a consultation window | Dedicated consultation room |
| Pharmacist’ Knowledge and Clinical Medication Practice Competency | Poor | Good |
| Fee | Free | Fixed fee (￥10-12) |
| Which one would you prefer? |  |  |  |
| 12. | | | |
|  | Option 1 | Option 2 | Option 3 |
| Pharmacist-Managed Clinic Core (Focus) | Follow-up on medication | Evaluation of medication regimen | Neither. |
| Frequency | Full or half-day clinic on weekdays | 3-4 times per week |
| Type | Physician-pharmacist joint clinic | Comprehensive pharmaceutical clinic |
| Consultation Room | Only a consultation window | Shared consultation rooms with other clinics |
| Pharmacist’ Knowledge and Clinical Medication Practice Competency | Poor | Fair |
| Fee | Fixed fee (￥10-12) | Charge according to pharmacist title (refer to doctor registration fee) |
| Which one would you prefer? |  |  |  |
| 13. | | | |
|  | Option 1 | Option 2 | Option 3 |
| Pharmacist-Managed Clinic Core (Focus) | Patient medication education and counseling | Follow-up on medication | Neither. |
| Frequency | Full or half-day clinic on weekdays | 3-4 times per week |
| Type | Pharmaceutical specialist clinic | Physician-pharmacist joint clinic |
| Consultation Room | Shared consultation rooms with other clinics | Dedicated consultation room |
| Pharmacist’ Knowledge and Clinical Medication Practice Competency | Good | Poor |
| Fee | Charge according to pharmacist title (refer to doctor registration fee) | Fixed fee (￥10-12) |
| Which one would you prefer? |  |  |  |

Version three

| 1. | | | |
| --- | --- | --- | --- |
|  | Option 1 | Option 2 | Option 3 |
| Pharmacist-Managed Clinic Core (Focus) | Patient medication education and counseling | Evaluation of medication regimen | Neither. |
| Frequency | Full or half-day clinic on weekdays | 1-2 times per week |
| Type | Physician-pharmacist joint clinic | Pharmaceutical specialist clinic |
| Consultation Room | Shared consultation rooms with other clinics | Only a consultation window |
| Pharmacist’ Knowledge and Clinical Medication Practice Competency | Poor | Good |
| Fee | Free | Charge according to pharmacist title (refer to doctor registration fee) |
| Which one would you prefer? |  |  |  |
| 2. | | | |
|  | Option 1 | Option 2 | Option 3 |
| Pharmacist-Managed Clinic Core (Focus) | Developing or adjusting medication regimen | Patient medication education and counseling | Neither. |
| Frequency | 1-2 times per week | 3-4 times per week |
| Type | Comprehensive pharmaceutical clinic | Pharmaceutical specialist clinic |
| Consultation Room | Dedicated consultation room | Only a consultation window |
| Pharmacist’ Knowledge and Clinical Medication Practice Competency | Poor | Fair |
| Fee | Fixed fee (￥10-12) | Free |
| Which one would you prefer? |  |  |  |
| 3. | | | |
|  | Option 1 | Option 2 | Option 3 |
| Pharmacist-Managed Clinic Core (Focus) | Follow-up on medication | Patient medication education and counseling | Neither. |
| Frequency | 3-4 times per week | Full or half-day clinic on weekdays |
| Type | Pharmaceutical specialist clinic | Comprehensive pharmaceutical clinic |
| Consultation Room | Dedicated consultation room | Shared consultation rooms with other clinics |
| Pharmacist’ Knowledge and Clinical Medication Practice Competency | Good | Fair |
| Fee | Free | Fixed fee (￥10-12) |
| Which one would you prefer? |  |  |  |
| 4. | | | |
|  | Option 1 | Option 2 | Option 3 |
| Pharmacist-Managed Clinic Core (Focus) | Developing or adjusting medication regimen | Follow-up on medication | Neither. |
| Frequency | 1-2 times per week | Full or half-day clinic on weekdays |
| Type | Physician-pharmacist joint clinic | Comprehensive pharmaceutical clinic |
| Consultation Room | Dedicated consultation room | Only a consultation window |
| Pharmacist’ Knowledge and Clinical Medication Practice Competency | Fair | Poor |
| Fee | Free | Charge according to pharmacist title (refer to doctor registration fee) |
| Which one would you prefer? |  |  |  |
| 5. | | | |
|  | Option 1 | Option 2 | Option 3 |
| Pharmacist-Managed Clinic Core (Focus) | Patient medication education and counseling | Evaluation of medication regimen | Neither. |
| Frequency | 3-4 times per week | 1-2 times per week |
| Type | Pharmaceutical specialist clinic | Physician-pharmacist joint clinic |
| Consultation Room | Shared consultation rooms with other clinics | Only a consultation window |
| Pharmacist’ Knowledge and Clinical Medication Practice Competency | Fair | Good |
| Fee | Fixed fee (￥10-12) | Free |
| Which one would you prefer? |  |  |  |
| 6. | | | |
|  | Option 1 | Option 2 | Option 3 |
| Pharmacist-Managed Clinic Core (Focus) | Developing or adjusting medication regimen | Follow-up on medication | Neither. |
| Frequency | 1-2 times per week | Full or half-day clinic on weekdays |
| Type | Comprehensive pharmaceutical clinic | Physician-pharmacist joint clinic |
| Consultation Room | Only a consultation window | Dedicated consultation room |
| Pharmacist’ Knowledge and Clinical Medication Practice Competency | Poor | Fair |
| Fee | Charge according to pharmacist title (refer to doctor registration fee) | Free |
| Which one would you prefer? |  |  |  |
| 7. | | | |
|  | Option 1 | Option 2 | Option 3 |
| Pharmacist-Managed Clinic Core (Focus) | Developing or adjusting medication regimen | Patient medication education and counseling | Neither. |
| Frequency | 1-2 times per week | Full or half-day clinic on weekdays |
| Type | Comprehensive pharmaceutical clinic | Physician-pharmacist joint clinic |
| Consultation Room | Shared consultation rooms with other clinics | Dedicated consultation room |
| Pharmacist’ Knowledge and Clinical Medication Practice Competency | Fair | Good |
| Fee | Free | Charge according to pharmacist title (refer to doctor registration fee) |
| Which one would you prefer? |  |  |  |
| 8. | | | |
|  | Option 1 | Option 2 | Option 3 |
| Pharmacist-Managed Clinic Core (Focus) | Patient medication education and counseling | Developing or adjusting medication regimen | Neither. |
| Frequency | 3-4 times per week | 1-2 times per week |
| Type | Physician-pharmacist joint clinic | Pharmaceutical specialist clinic |
| Consultation Room | Only a consultation window | Shared consultation rooms with other clinics |
| Pharmacist’ Knowledge and Clinical Medication Practice Competency | Poor | Good |
| Fee | Free | Charge according to pharmacist title (refer to doctor registration fee) |
| Which one would you prefer? |  |  |  |
| 9. | | | |
|  | Option 1 | Option 2 | Option 3 |
| Pharmacist-Managed Clinic Core (Focus) | Patient medication education and counseling | Follow-up on medication | Neither. |
| Frequency | 1-2 times per week | Full or half-day clinic on weekdays |
| Type | Physician-pharmacist joint clinic | Comprehensive pharmaceutical clinic |
| Consultation Room | Dedicated consultation room | Only a consultation window |
| Pharmacist’ Knowledge and Clinical Medication Practice Competency | Poor | Fair |
| Fee | Fixed fee (￥10-12) | Free |
| Which one would you prefer? |  |  |  |
| 10. | | | |
|  | Option 1 | Option 2 | Option 3 |
| Pharmacist-Managed Clinic Core (Focus) | Patient medication education and counseling | Follow-up on medication | Neither. |
| Frequency | 1-2 times per week | 3-4 times per week |
| Type | Comprehensive pharmaceutical clinic | Pharmaceutical specialist clinic |
| Consultation Room | Dedicated consultation room | Shared consultation rooms with other clinics |
| Pharmacist’ Knowledge and Clinical Medication Practice Competency | Good | Fair |
| Fee | Free | Charge according to pharmacist title (refer to doctor registration fee) |
| Which one would you prefer? |  |  |  |
| 11. | | | |
|  | Option 1 | Option 2 | Option 3 |
| Pharmacist-Managed Clinic Core (Focus) | Developing or adjusting medication regimen | Follow-up on medication | Neither. |
| Frequency | Full or half-day clinic on weekdays | 1-2 times per week |
| Type | Physician-pharmacist joint clinic | Pharmaceutical specialist clinic |
| Consultation Room | Only a consultation window | Dedicated consultation room |
| Pharmacist’ Knowledge and Clinical Medication Practice Competency | Good | Poor |
| Fee | Fixed fee (￥10-12) | Free |
| Which one would you prefer? |  |  |  |
| 12. | | | |
|  | Option 1 | Option 2 | Option 3 |
| Pharmacist-Managed Clinic Core (Focus) | Developing or adjusting medication regimen | Evaluation of medication regimen | Neither. |
| Frequency | 1-2 times per week | 3-4 times per week |
| Type | Physician-pharmacist joint clinic | Comprehensive pharmaceutical clinic |
| Consultation Room | Shared consultation rooms with other clinics | Dedicated consultation room |
| Pharmacist’ Knowledge and Clinical Medication Practice Competency | Poor | Good |
| Fee | Charge according to pharmacist title (refer to doctor registration fee) | Fixed fee (￥10-12) |
| Which one would you prefer? |  |  |  |
| 13. | | | |
|  | Option 1 | Option 2 | Option 3 |
| Pharmacist-Managed Clinic Core (Focus) | Follow-up on medication | Patient medication education and counseling | Neither. |
| Frequency | 3-4 times per week | Full or half-day clinic on weekdays |
| Type | Pharmaceutical specialist clinic | Comprehensive pharmaceutical clinic |
| Consultation Room | 3-4 times per week | Full or half-day clinic on weekdays |
| Pharmacist’ Knowledge and Clinical Medication Practice Competency | Good | Fair |
| Fee | Free | Fixed fee (￥10-12) |
| Which one would you prefer? |  |  |  |

Supplementary File 3

Table1 Hierarchical importance of attributes based on partial log-likelihood analysis

| Attributes and levels | Log likelihood | Partial effect-change in log likelihood | Relative effect-%sum of change in log likelihood |
| --- | --- | --- | --- |
| None | -1589.02 |  |  |
| ability3 | -1681.87 | -92.851 | 56.95% |
| cost3 | -1620.19 | -31.1729 | 19.12% |
| ability2 | -1600.17 | -11.1541 | 6.84% |
| type3 | -1598.78 | -9.75984 | 5.99% |
| cost2 | -1595.85 | -6.83629 | 4.19% |
| place3 | -1595.73 | -6.71195 | 4.12% |
| type2 | -1592.24 | -3.22348 | 1.98% |
| times3 | -1589.61 | -0.58815 | 0.36% |
| point4 | -1589.52 | -0.50511 | 0.31% |
| place2 | -1589.14 | -0.12129 | 0.07% |
| times2 | -1589.08 | -0.05708 | 0.04% |
| point2 | -1589.05 | -0.03341 | 0.02% |
| point3 | -1589.03 | -0.01341 | 0.01% |
